# Supplementary material
Source: bioRxiv or medRxiv preprint supplement (https://www.biorxiv.org/content/biorxiv/early/2021/07/31/2021.07.30.454424/DC2/embed/media-2.pdf)

Phenogram PC1

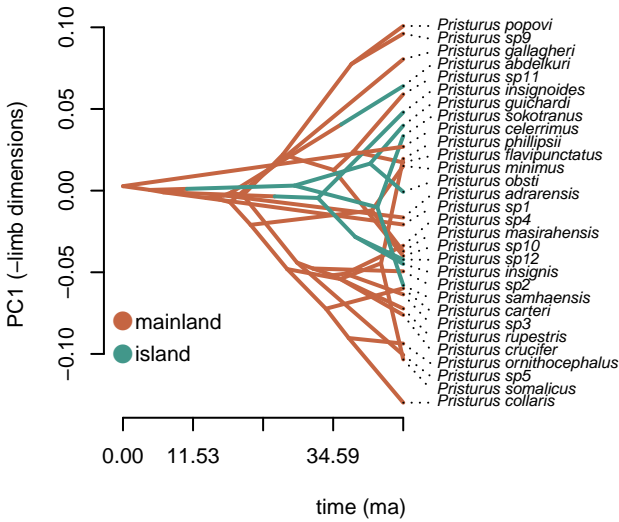

Phenogram PC1

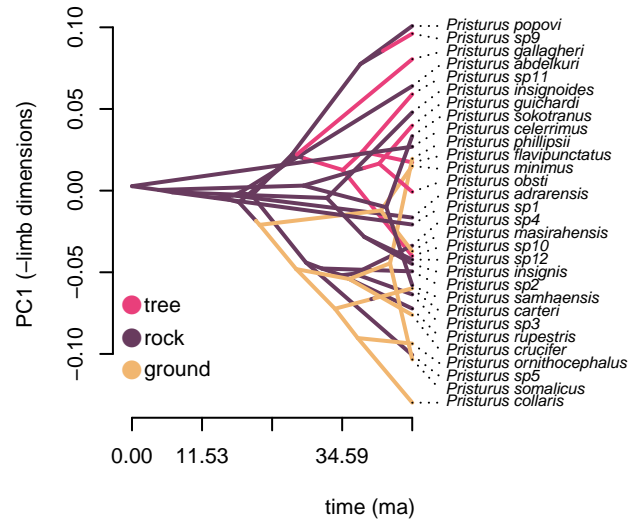

Phenogram PC2

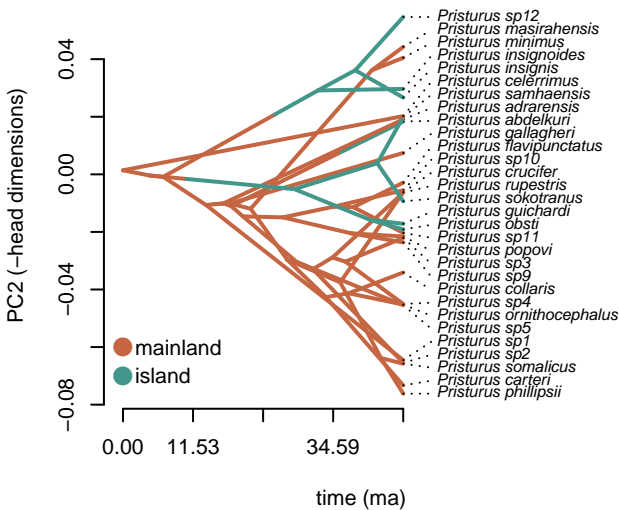

Phenogram PC2

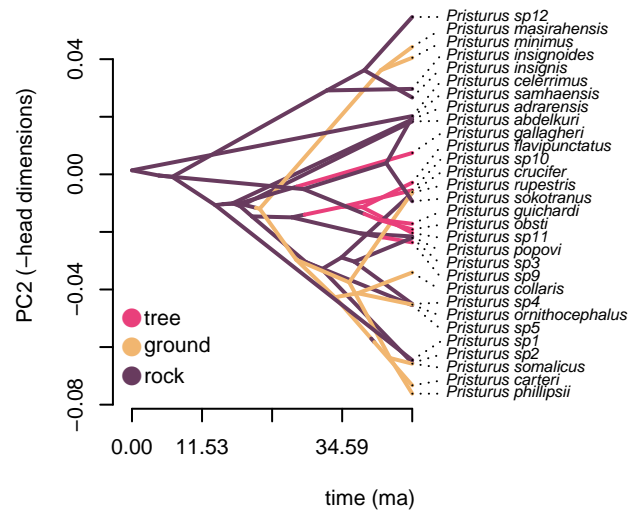

Phenogram SVL

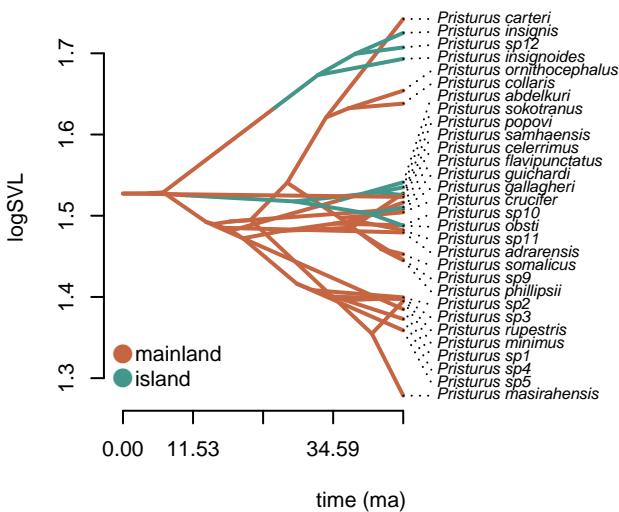

Phenogram SVL

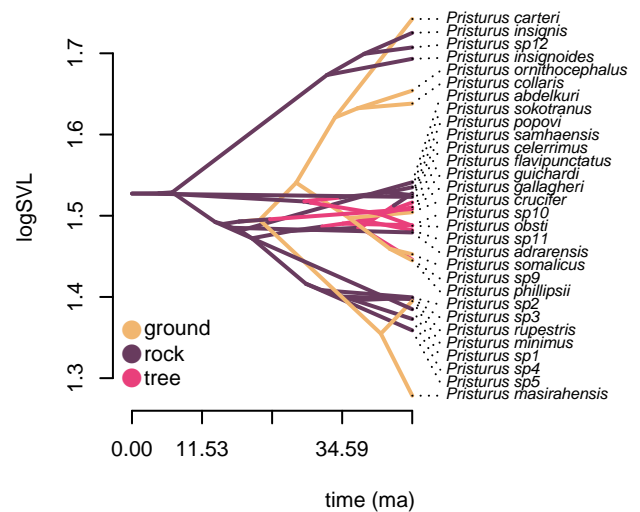

Supplement: Supplementary file [file media-2.pdf]
